# Supplementary material for: Spatial heterogeneity of soil nutrients in Yili River Valley
Source: PeerJ. 2022 May 3;10:e13311. doi: 10.7717/peerj.13311 (PMC9074871; doi:10.7717/peerj.13311)
Supplement: Supplemental Information 1 [file peerj-10-13311-s001.xlsx]

## Sheet: Sheet1
Serial Numbe	E	N	SOC（g/kg）	STN（g/kg）	STP（g/kg）	STK（g/kg）	SAND(%)	SWC(%)	SBD(g/cm3)	Silt(%)	pH
1	81.1781	43.9808	3.103	0.413	0.669	13.803	34.7683	11.73	1.47252	58.9895	8.2
2	81.1802	43.983	4.387	0.585	0.748	14.767	41.9996	10.6076	1.20948	53.7293	8.27
3	81.1772	43.9848	4.376	0.483	0.7	14.308	33.4992	3.33991	1.23899	58.4726	8.29
4	81.1744	43.9851	5.717	0.618	0.555	13.945	39.9743	4.47	1.6	52.9077	8.17
5	81.177	43.9848	4.096	0.531	0.752	14.064	32.7097	12.4395	1.29861	61.9139	8.28
6	81.1779	43.985	7.798	0.839	0.703	14.897	35.0135	7.00423	1.24977	56.9026	8.2
7	81.1881	43.9866	4.995	0.607	0.735	14.356	30.2063	7.80471	1.29092	62.5385	8.2
8	81.1947	43.9861	3.85	0.544	0.603	14.009	35.9637	3.45387	1.33755	57.8017	8.32
9	81.1893	44.0102	6.786	0.898	0.706	14.439	50.9186	3.75479	1.22761	44.2804	8.24
10	81.1892	44.0102	5.317	0.735	0.674	14.145	35.9596	4.11418	1.35985	58.0165	8.33
11	81.1821	44.027	4.884	0.595	0.8	15.086	32.4551	4.62963	1.17515	59.8309	8.38
12	81.1873	44.0243	7.106	0.709	0.625	14.097	30.789	9.11871	1.20191	61.315	8.23
13	81.194	44.0207	4.831	0.67	0.659	14.636	33.0993	5.77508	1.22681	58.7714	8.62
14	81.1756	44.0194	4.73	0.566	0.67	14.334	25.1002	3.05657	1.20559	67.7848	8.28
15	81.1637	44.0103	5.049	0.555	0.573	14.289	44.4243	3.68109	1.26842	49.8224	8.25
16	81.1806	44.0113	3.99	0.561	0.731	14.392	39.923	2.86816	1.22299	54.1807	8.41
17	81.1698	43.9774	3.697	0.45	0.699	14.176	31.191	4.10574	1.21795	61.5898	8.28
18	81.1544	43.98	3.713	0.502	0.642	5.206	45.3166	2.88248	1.31876	49.2239	8.35
19	81.1556	43.9928	5.476	0.565	0.461	14.455	39.1638	4.13895	1.34052	52.2703	8.44
20	81.1505	44.0258	7.992	0.933	0.76	15.347	29.4952	4.5143	1.30854	63.4724	8.36
21	81.1432	44.0381	5.473	0.601	0.648	14.03	40.8585	2.66503	1.13493	53.7785	8.34
22	81.1423	44.0499	8.889	0.955	0.731	14.231	32.6772	3.43583	1.20951	58.1703	8.2875
23	81.1555	44.0626	4.097	0.56	0.692	13.976	31.146	3.66047	1.25694	61.0695	8.35
24	81.186	44.1583	24.582	2.362	0.82	14.426	21.7862	9.8513	0.928892	64.3254	7.68
25	81.1719	44.1385	6.301	0.77	0.763	13.697	33.8102	3.27056	1.24529	59.3374	8.07
26	81.1788	44.1163	18.542	1.938	0.779	14.764	31.4647	7.35868	1.11596	55.7853	8.04
27	81.162	44.0922	6.046	0.717	0.67	13.937	38.2476	3.86343	1.3264	61.2752	8.23
28	81.1818	44.075	9.034	0.923	0.77	14.252	45.0047	5.17747	1.16594	56.0516	7.92
29	81.2004	44.0494	4.745	0.623	0.691	13.477	45.1133	3.14644	1.23963	55.5597	8.15
30	81.181	44.0645	4.677	0.636	0.659	13.562	36.3036	3.93939	1.34571	62.067	8.23
31	81.2048	44.0882	4.066	0.572	0.679	14.048	29.4338	2.88643	1.25238	70.3193	8.23
32	81.2126	44.1528	12.555	1.584	0.888	14.766	50.1065	5.83977	1.18164	61.3084	8.6025
33	81.2025	44.1339	5.66	0.792	0.755	13.293	30.1745	5.4416	1.11172	62.8188	8.34
34	81.2014	44.1162	9.371	1.057	0.656	12.59	31.9108	10.3388	1.31569	54.5024	8.15
35	81.2013	44.1046	4.227	0.581	0.8	12.798	33.7678	3.1583	1.19464	50.9836	8.36
36	81.2596	44.0108	3.537	0.433	0.676	12.759	30.3312	2.71283	1.33429	49.375	8.29
37	81.2083	44.015	3.73	0.437	0.663	13.158	36.2543	2.26334	1.19278	58.4961	8.24
38	81.2139	44.0062	4.814	0.578	0.672	12.402	51.5931	3.95185	1.60324	62.4384	7.9
39	81.2075	44.0079	3.881	0.539	0.691	13.928	16.1196	4.20826	1.30899	37.7138	8.11
40	81.1988	43.9988	3.776	0.539	0.384	11.342	37.1195	3.44915	1.43214	55.4939	8.07
41	81.2028	44.0253	4.988	0.699	0.643	12.972	35.8885	3.8082	1.21865	41.2692	8.08
42	81.2076	44.0185	5.125	0.72	0.772	13.661	34.9316	2.9326	1.13113	46.751	8.05
43	81.2074	44.0396	4.263	0.595	0.702	13.598	31.2246	2.99233	1.33871	65.055	8.16
44	81.2107	44.0283	4.603	0.645	0.738	13.448	33.5396	4.85124	1.25416	60.1461	8.22
45	81.2129	44.0228	4.976	0.617	0.749	13.925	32.4645	5.35892	1.23308	54.2383	8.18
46	81.2323	44.0565	7.027	1.003	0.756	11.556	23.1929	9.57139	1.44324	61.8462	8.28
47	81.2261	44.0755	6.495	0.912	0.737	13.974	32.3501	3.4736	1.28621	62.0176	8.3
48	81.2253	44.1103	6.885	0.91	0.4	11.169	61.5444	5.56745	1.66796	59.8005	7.97
49	81.2277	44.1173	5.645	0.732	0.547	13.535	34.3494	4.00132	1.21957	60.5179	8.12
50	81.2298	44.1324	6.725	0.888	0.678	14.168	21.914	7.30594	1.19325	57.0692	8.11
51	81.2729	44.1468	12.808	1.623	1.05	12.646	35.0783	8.72234	1.31449	42.1606	8.14
52	81.2746	44.127	5.24	0.725	0.793	12.813	22.5387	4.68365	1.21166	71.7063	8.16
53	81.2661	44.1024	5.004	0.672	0.783	13.943	26.3512	4.34311	1.26506	56.2609	8.16
54	81.2448	44.0729	4.729	0.669	0.73	13.93	32.2177	3.17241	1.29749	57.5039	8.23
55	81.2315	44.0455	4.202	0.582	0.716	13.305	36.6857	2.14233	1.38126	59.2579	8.28
56	81.2392	44.0183	4.137	0.509	0.688	13.088	30.2176	8.26698	1.24096	61.8379	8.18
57	81.2334	44.026	8.387	0.947	0.735	13.429	37.7183	4.24303	1.16709	60.6211	8.11
58	81.2438	44.0231	3.863	0.46	0.681	13.163	29.8761	0.200286	1.38402	61.7462	8.23
59	81.243	44.0242	4.693	0.553	0.762	13.32	34.8577	2.53142	1.22986	61.697	8.26
60	81.2438	44.0252	3.844	0.483	0.711	13.602	25.0041	5.21341	1.16834	59.8727	8.13
61	81.2754	44.0709	7.412	0.907	0.77	13.772	19.2149	3.91735	1.29779	31.8438	8.11
62	81.2794	44.0684	4.198	0.53	0.698	13.01	33.0146	2.15954	1.30167	59.9935	8.18
63	81.2552	44.0682	4.715	0.577	0.741	14.009	25.6088	4.6832	1.18526	69.5198	8.2
64	81.2574	44.0612	3.854	0.41	0.816	13.79	35.3624	3.06614	1.22049	58.6816	8.23
65	81.2535	44.0556	4.805	0.542	0.714	13.756	31.5831	6.21167	1.11927	69.4754	8.18
66	81.2495	44.0488	4.577	0.574	0.772	14.231	26.9717	2.74318	1.23973	65.61	8.22
67	81.2539	44.0445	5.747	0.75	0.743	13.565	40.2997	4.33372	1.22615	61.2726	8.17
68	81.2653	44.0421	2.04	0.28	0.714	11.691	35.7332	5.03109	1.30117	57.5167	8.01
69	81.2801	44.04	4.663	0.577	0.647	13.675	27.1758	2.81996	1.23681	62.081	8.18
70	81.2782	44.0356	4.783	0.558	0.699	13.894	28.0846	4.44894	1.17404	56.6972	8.1
71	81.2778	44.0355	4.112	0.493	0.727	13.894	29.0014	4.35126	1.07806	62.085	8.15
72	81.2558	44.026	3.717	0.496	0.725	13.905	29.5402	2.44137	1.24202	58.9315	8.23
73	81.2575	44.0324	4.727	0.568	0.699	13.98	29.8233	3.59075	1.26923	65.3485	8.16
74	81.2429	44.0415	5.359	0.56	0.664	13.306	38.425	3.2307	1.29303	68.8598	8.17
75	81.2721	44.048	4.429	0.565	0.744	13.903	26.1622	2.83134	1.34753	60.3224	8.21
76	81.2827	44.0601	5.105	0.563	0.704	13.851	23.6751	5.12454	1.24059	66.9773	8.2
77	81.2837	44.0872	8.66	0.903	0.675	14.379	29.5184	5.18241	1.1216	58.9628	8.18
78	81.2908	44.1105	10.735	1.072	0.778	14.755	20.5672	6.73224	1.14626	61.5452	7.95
79	81.2987	44.1366	8.61	0.919	0.756	14.639	19.2601	7.24707	1.11517	65.8258	8.05
80	81.3099	44.1248	2.237	0.241	0.62	11.921	30.1581	6.15612	1.34234	49.7138	8.15
81	81.3407	44.1405	20.556	2.04	1.006	15.018	22.2859	5.66091	1.1915	57.4128	8.04
82	81.404	44.0377	6.498	0.542	0.65	13.368	25.0808	3.82875	1.15425	65.5567	8.08
83	81.4142	44.0425	7.5	0.644	0.646	13.594	26.8013	4.06203	1.26705	64.7634	8.12
84	81.4065	44.0474	5.747	0.636	0.713	14.033	23.7523	4.10818	1.15051	63.2147	8.11
85	81.4226	44.0346	5.514	0.56	0.712	13.794	31.4076	4.30579	1.26747	64.1341	8.14
86	81.4356	44.0347	4.72	0.476	0.686	13.796	27.0811	4.35802	1.2202	62.337	8.22
87	81.4367	44.0523	7.095	0.631	0.63	12.313	38.8397	5.96158	1.20839	54.9761	8.17
88	81.4155	44.063	7.201	0.684	0.701	14.554	26.1438	5.20244	1.2718	65.5022	8.14
89	81.4266	44.0787	5.966	0.732	0.719	14.257	24.0717	4.60846	1.20098	67.4181	8.15
90	81.4488	44.076	5.872	0.601	0.64	14.156	24.7619	6.04719	1.49883	64.5078	8.13
91	81.4682	44.0677	3.844	0.341	0.685	13.179	36.5831	8.7334	1.32236	72.2774	8.09
92	81.4571	44.1049	8.776	0.849	0.725	14.767	25.1815	7.28811	1.20238	72.5662	8.12
93	81.4672	44.1588	34.794	3.518	0.719	15.152	16.0508	11.3214	1.07478	63.6805	7.61
94	81.4661	44.1348	19.325	1.957	0.776	15.92	20.5027	10.2549	1.12388	69.7563	7.84
95	81.4372	44.123	8.669	1.059	0.661	14.061	22.9275	6.89687	1.22952	66.0416	8.06
96	81.4117	44.0974	7.312	0.945	0.691	12.001	58.7026	5.25677	1.33171	65.095	8.05
97	81.4279	44.0881	19.244	1.841	0.746	13.433	31.8779	8.1414	1.11636	68.2062	8
98	81.4088	44.136	14.745	1.547	0.695	13.261	23.3354	7.37344	1.27575	62.9238	7.98
99	81.3973	44.1123	8.167	0.972	0.647	11.406	45.0599	6.8295	1.01686	66.2501	7.94
100	81.3912	44.0851	6.61	0.895	0.44	9.608	14.0644	9.22717	1.58226	54.7199	7.92
101	81.3836	44.0601	5.884	0.84	0.71	13.805	20.4368	4.21389	1.33392	64.2733	8.09
102	81.3795	44.0442	8.022	0.706	0.76	14.039	27.9268	5.11089	1.3647	67.4615	8.05
103	81.4047	44.015	22.924	2.094	0.846	12.366	17.4555	10.3201	0.998944	67.0375	8
104	81.3028	44.0598	3.291	0.378	0.709	12.084	32.259	1.7812	1.28784	59.2567	8.18
105	81.3808	44.1474	15.731	1.575	0.803	14.839	19.5135	7.63235	1.07183	67.5615	8.01
106	81.3619	44.1299	11.163	1.259	0.646	12.642	30.7235	5.40128	1.30139	75.8014	7.98
107	81.3569	44.1154	10.882	1.104	0.727	13.949	25.8245	6.31485	1.20414	71.9704	8.1
108	81.3395	44.0984	9.701	1.036	0.776	13.886	23.1395	5.46156	1.17247	69.3737	8.11
109	81.3401	44.0787	10.557	1.096	0.813	13.978	21.839	6.91396	1.19407	37.2166	8.19
110	81.322	44.0697	8.555	0.945	0.683	13.007	24.4367	3.20616	1.22464	62.1016	8.24
111	81.3491	44.0628	6.437	0.718	0.675	13.382	25.4255	3.3855	1.14507	68.5539	8.26
112	81.3222	44.049	7.288	0.929	0.731	13.323	25.8756	2.41904	1.31929	50.4757	8.19
113	81.3364	44.0382	4.762	0.65	0.795	13.248	26.6714	2.4514	1.47835	70.5329	8.24
114	81.3184	44.0294	4.809	0.663	0.789	13.562	22.8633	10.4046	1.41444	71.1738	8.17
115	81.3118	44.0295	4.644	0.487	0.795	13.522	23.3444	3.08343	1.31807	61.8371	8.21
116	81.088	43.9723	4.694	0.457	0.733	12.753	36.2754	1.60489	1.29931	75.1123	8.49
117	81.0851	43.9757	8.015	0.613	0.582	12.001	69.0712	3.04472	1.34322	59.9805	8.25
118	81.0846	43.9774	6.298	0.511	0.508	12.883	60.4921	3.7066	1.42091	70.2498	8.32
119	81.1021	43.9849	16.266	1.186	0.745	12.823	37.0576	3.00139	1.25109	62.5843	8.31
120	81.1114	43.9693	3.392	0.308	0.728	12.313	47.0677	1.85202	1.21232	65.7504	8.78
121	81.1108	43.9777	4.375	0.559	0.643	13.171	42.874	2.22313	1.43302	68.5661	8.37
122	81.1209	43.9806	4.145	0.328	0.627	12.421	38.8112	2.44147	1.55479	69.4605	8.24
123	81.1326	43.9696	4.684	0.406	0.69	12.925	42.96	2.4895	1.32146	69.2899	8.28
124	81.1461	43.9696	5.675	0.69	0.785	13.043	39.0998	1.83125	1.18087	68.1442	8.04
125	81.1402	43.9984	5.679	0.677	0.74	13.208	33.9333	10.7807	1.07732	69.4369	8.32
126	81.1789	43.9895	5.183	0.668	0.776	13.374	33.6984	5.218	1.34117	73.3683	8.21
127	81.1772	43.9851	8.874	0.841	0.703	12.608	43.8394	4.94797	1.34194	73.7421	8.13
